# Supplementary material for: Nanoemulsion-Based Orodispersible Film Formulation of Guava Leaf Oil for Inhibition of Oral Cancer Cells
Source: MDPI journal article supplement (doi:10.3390/pharmaceutics15112631), 2023-11-16
Supplement: s1 [file s1]

# Supplementary Material: Nanoemulsion-Based Orodispersible Film Formulation of Guava Leaf Oil for Inhibition of Oral Cancer Cells

Yotsanan Weerapol, Suwisit Manmuan, Tiraniti Chuenbarn, Sontaya Limmatvapirat, and Sukannika Tubtimsri

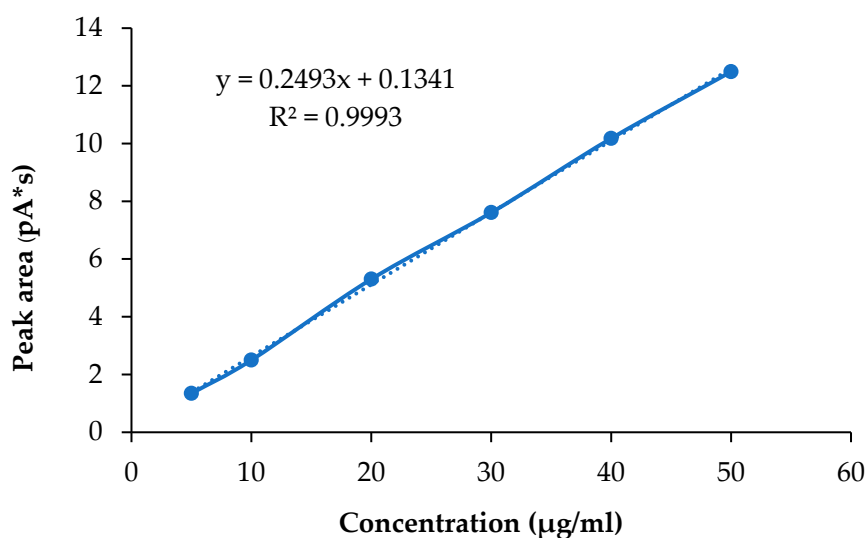

**Figure S1.** Standard curve of  $\beta$ -caryophyllene.

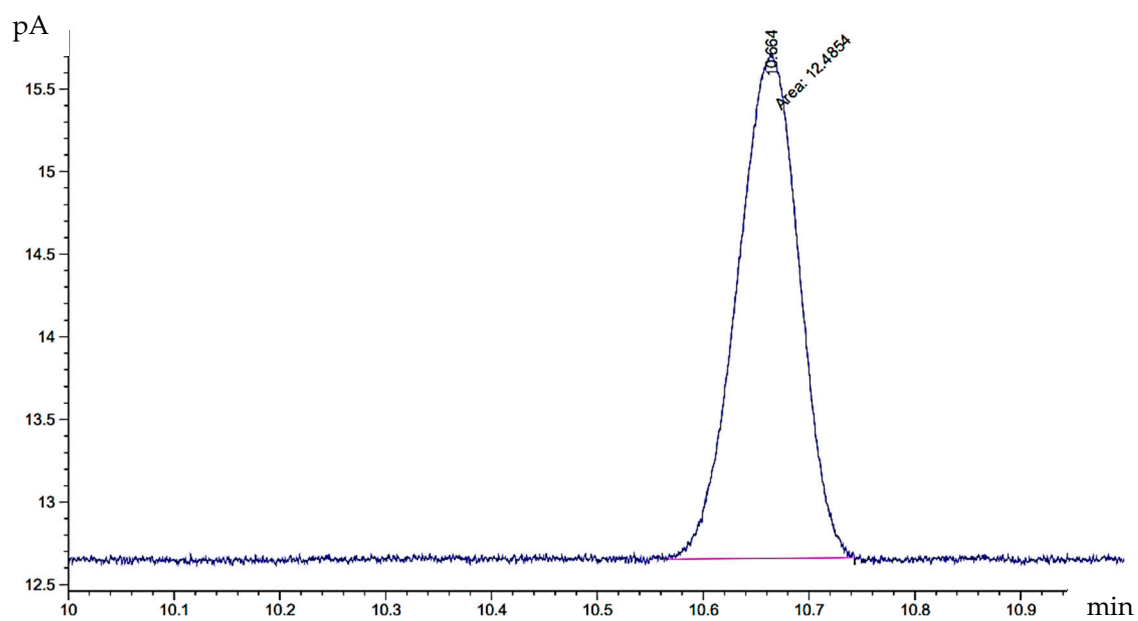

Figure S2. Chromatogram of  $\beta$ -caryophyllene.

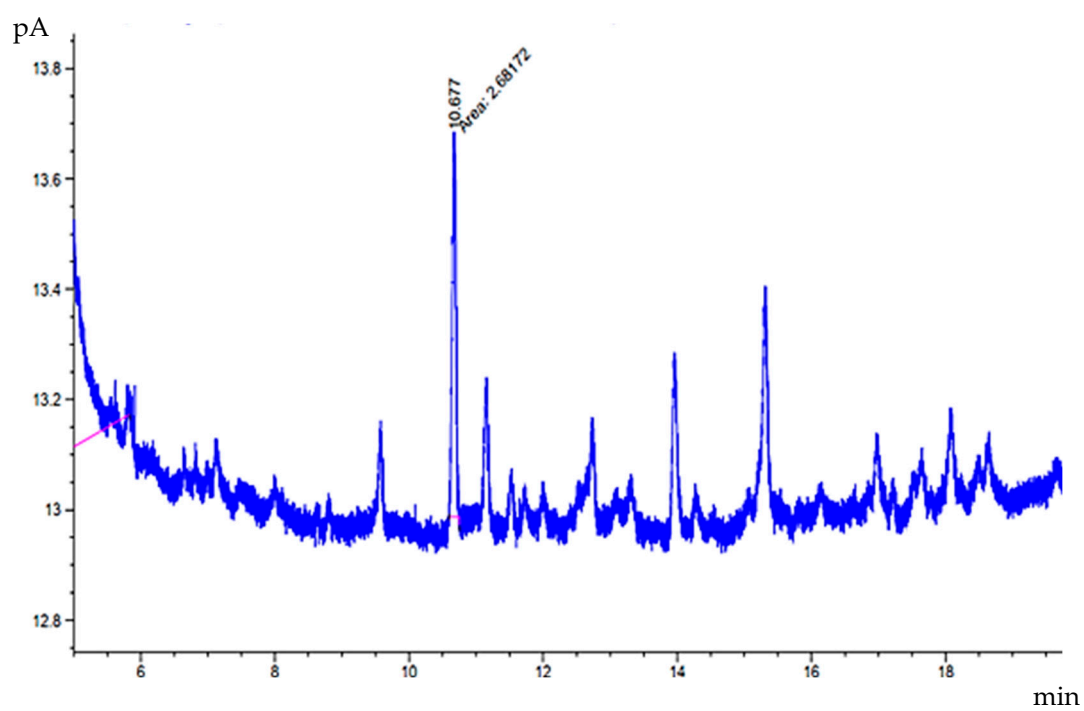

Figure S3. Chromatogram of GLO.
